# Supplementary material
Source: publisher figshare collection journal article supplement (https://frontiersin.figshare.com/ndownloader/files/14670164)
Supplement: Supplementary file [file 14670164]

## *Supplementary Material*

### **Repeated Sigma-1 receptor antagonist MR309 administration modulates central neuropathic pain development after spinal cord injury in mice**

Sílvia Castany<sup>a,b</sup>, Xavier Codony<sup>b</sup>, Daniel Zamanillo<sup>b</sup>, Manuel Merlos<sup>b</sup>, Enrique Verdú<sup>a,1</sup>, and Pere Boadas-Vaello<sup>a,1,\*</sup>

<sup>a</sup> Research Group of Clinical Anatomy, Embryology and Neuroscience (NEOMA), Department of Medical Sciences, Universitat de Girona (UdG), Girona, Spain.

<sup>b</sup> Esteve Pharmaceuticals, Drug Discovery and Preclinical Development, Parc Científic de Barcelona, Barcelona, Spain.

<sup>1</sup> Authors Pere Boadas-Vaello and Enrique Verdú Navarro contributed equally to this work

\* **Correspondence:** Pere Boadas Vaello : pere.boadas@udg.edu

## Supplementary Figures

Figure 2A-pERK/tERK 14D

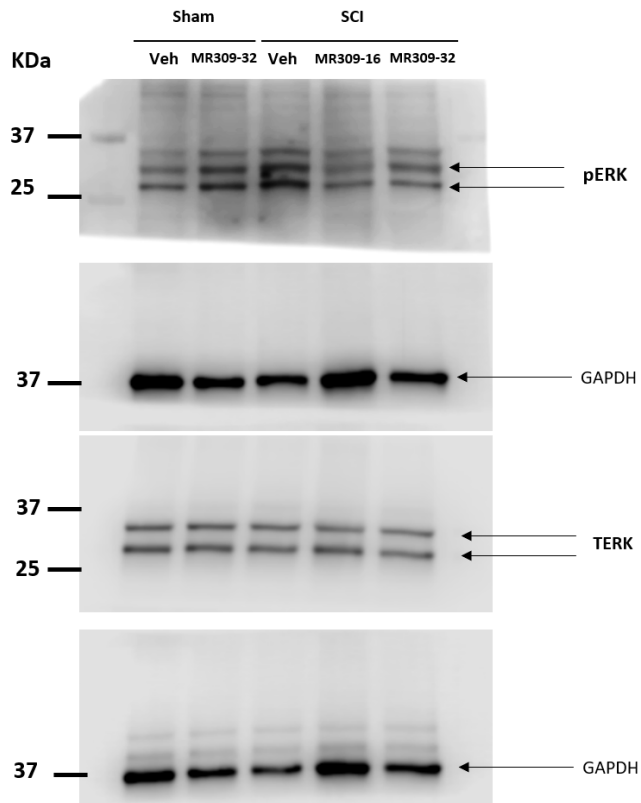

Figure 2B-pERK/tERK 28D

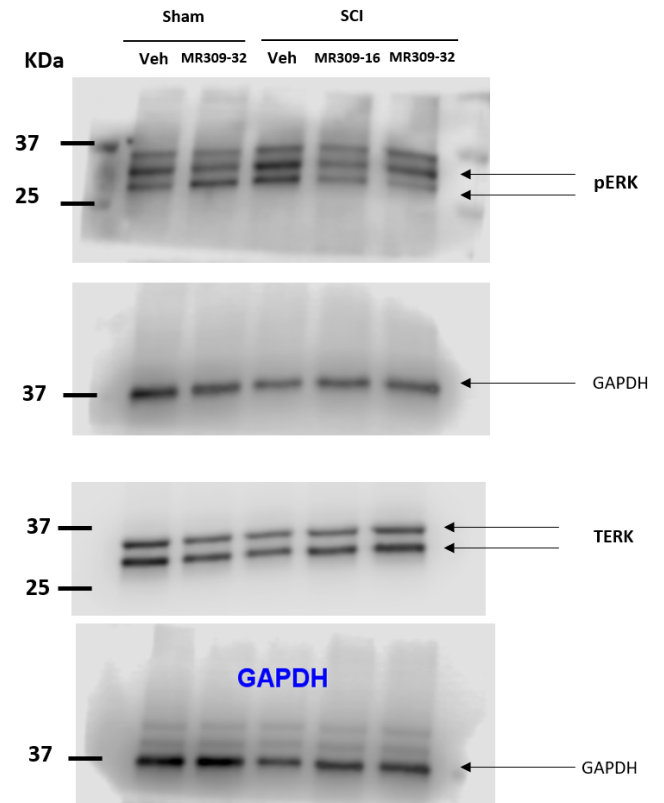

**Supplementary Figure S1.** Original scanned full blots for pERK, tERK and GAPDH shown in Figure 2 A,B.

**Figure 3A-Y1472 NR2B 14D**

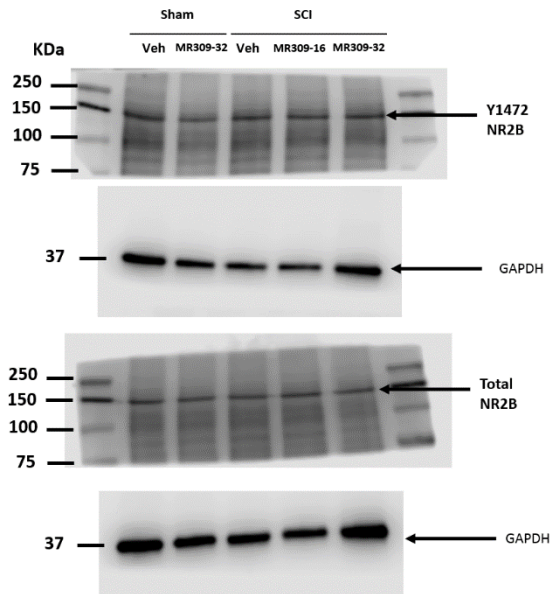

**Figure 3B-Y1472 NR2B 28D**

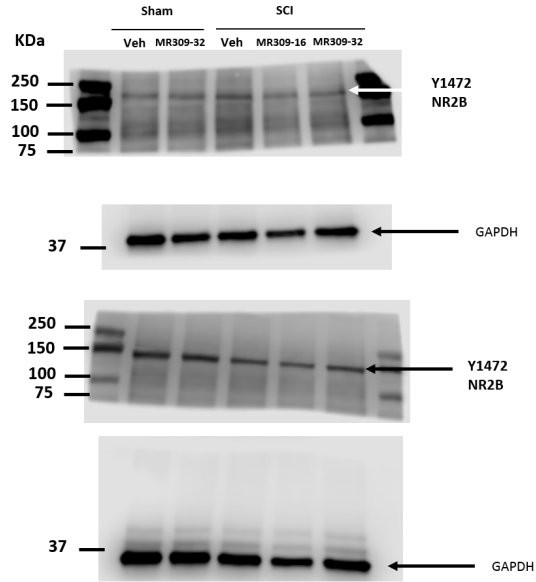

**Figure 3C-S1303 NR2B 14D**

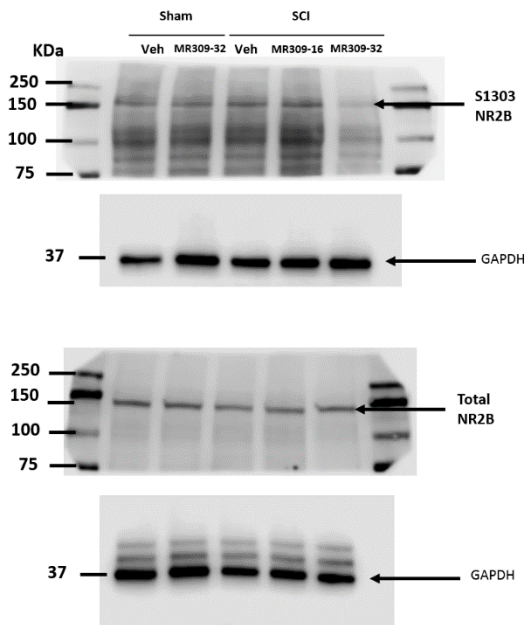

**Figure 3D-S1303 NR2B 28D**

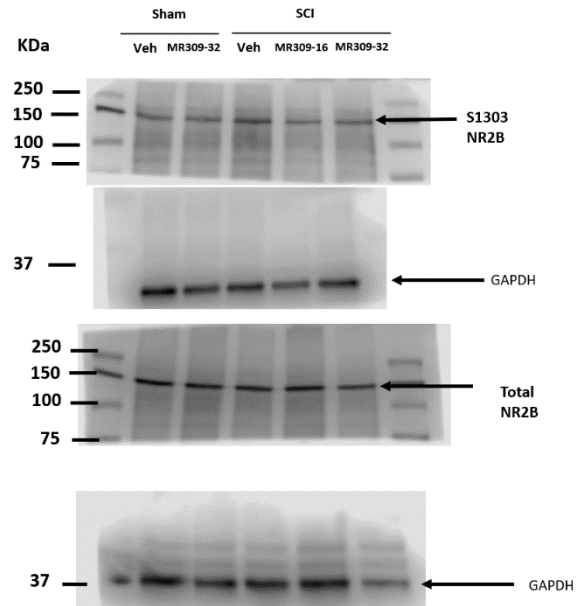

**Supplementary Figure S2.** Original scanned full blots for Y1472 and S1303 phosphorylation of NR2B, NR2B total and GAPDH shown in Figure 3 A,B,C,D.

**Figure 4A- TNF $\alpha$  14D**

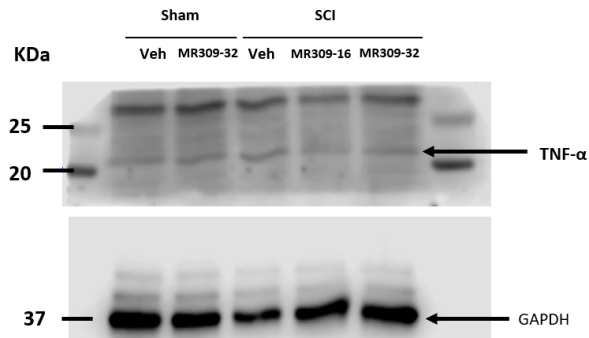

**Figure 4B – TNF $\alpha$  28D**

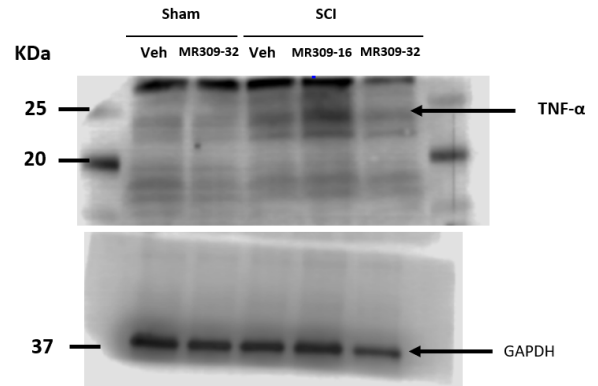

**Figure 4C- IL1 $\beta$  14D**

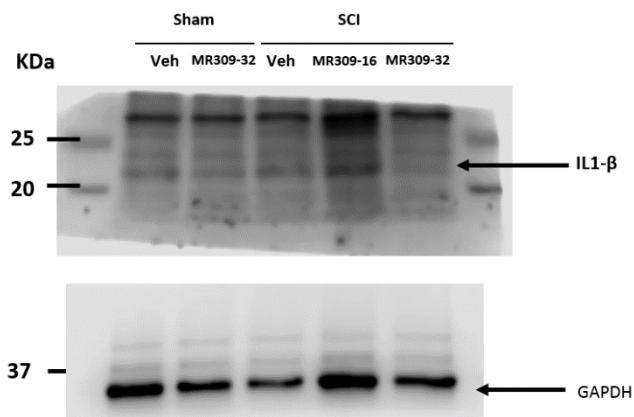

**Figure 4D – IL1 $\beta$  28D**

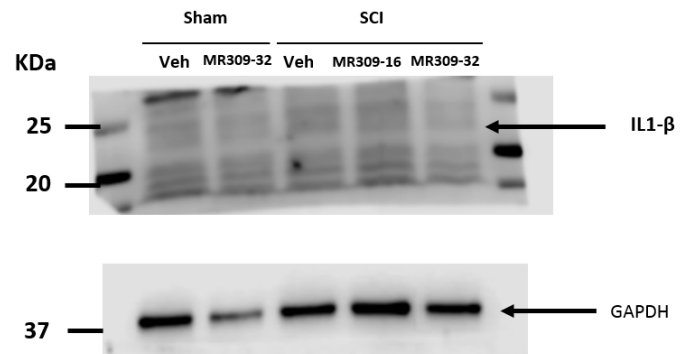

**Supplementary Figure S3.** Original scanned full blots for TNF- $\alpha$ , IL1 $\beta$  and GAPDH shown in Figure 4 A,B,C,D.
